# Supplementary material
Source: PubMed Central journal article supplement (PMC6130338)
Supplement: pnas.1802568115.sapp.pdf [file pnas.1802568115.sapp.pdf]

1 **Supplemental Information for:**

2 *Material microenvironmental properties couple to induce distinct transcriptional*  
3 *programs in mammalian stem cells*

4  
5 Contents:

- 6 1. Methods  
7 2. Supplemental Figures  
8 3. Supplemental Tables  
9 4. Supplemental References

10  
11 **Methods**

12  
13 **Casting of Alginate Hydrogels**

14 Alginate type LF20/40 (FMC Biopolymer) was used as-received for the slow-relaxing  
15 hydrogels and was irradiated with an 8mRad cobalt source to form the fast-relaxing  
16 hydrogels. Alginates were modified with GGGGRGDSP peptides (Peptide 2.0) at the  
17 reported densities with standard carbodiimide chemistry as described previously(1). After  
18 modification, alginates were dialyzed against a NaCl gradient, treated with activated  
19 charcoal, and sterile-filtered. After lyophilization, all alginate was dissolved in serum-  
20 free DMEM (Lonza) at 2.5%.

21  
22 Hydrogels were cast by rapidly mixing the alginate solution with a CaSO<sub>4</sub> slurry via two  
23 syringes and ejecting the mixture between two glass plates, where it gelled over 1.5  
24 hours.

25  
26 For mMSC culture experiments, stiff slow-relaxing gels consisted of 2% LF20/40  
27 alginate and 82mM Ca, while stiff fast relaxing gels consisted of 2% LF20/40 8mRad  
28 alginate (referring to the lower molecular weight, irradiated alginate) and 199mM Ca.  
29 Intermediate stiffness slow-relaxing gels consisted of 2% LF20/40 alginate and 20mM

30 Ca, while intermediate stiffness fast relaxing gels consisted of 2% LF20/40 8mRad  
31 alginate and 42mM Ca. Soft slow-relaxing gels consisted of 2% LF20/40 alginate and  
32 8mM Ca, while fast relaxing gels consisted of 2% LF20/40 8mRad alginate and 19mM  
33 Ca. This difference in calcium concentration has previously been noted to have no effect  
34 on mesenchymal stem cell viability and differentiation(2, 3). 8mm disks were then cut  
35 from the gel using a biopsy punch.

36

37 For hNPC culture experiments, stiff slow-relaxing gels consisted of 2% LF20/40 alginate  
38 and 16mM Ca, while stiff fast relaxing gels consisted of 2% LF20/40 8mRad alginate and  
39 34mM Ca. Soft slow-relaxing gels consisted of 2% LF20/40 alginate and 5mM Ca, while  
40 soft fast relaxing gels consisted of 2% LF20/40 8mRad alginate and 13mM Ca. 8mm  
41 disks were then cut from the gel using a biopsy punch.

42

#### 43 **Adhesion Ligand Density (RGD Peptide) Quantification**

44 RGD coupling density was determined using the LavaPep assay following the  
45 manufacturers instructions. Coupled alginate was dissolved at a concentration of 0.1  
46 mg/mL in PBS before incubation with the LavaPep reagents. A standard curve of  
47 GGGGRGDSP peptides was prepared in PBS containing 0.1 mg/mL uncoupled alginate  
48 as background. Fluorescence was read using a Biotek plate reader and the resulting  
49 concentration was used to find the molar ratio of alginate to peptide. Molar concentration  
50 of peptide was calculated assuming a 2% alginate gel from the molar ratio. Reported  
51 values are consistent with previous studies using identical protocols (2).

52

### 53 **Justification for Physiologic Range of Adhesion Ligand Concentration**

54 Two methods were used to derive relevant physiologic ranges of adhesion ligand  
55 concentration. Developing de-cellularized myocardium was found by mass spectroscopy  
56 to contain predominantly Collagen I at a concentration of  $\sim 500\text{ng collagen/g tissue}$ (4). At  
57 a 2% protein concentration, comparable to our hydrogel's overall polymer content, this  
58 implies a  $1\text{e}15$  collagens/mL. With seven integrin binding sites per collagen, this value  
59 implies a  $70\ \mu\text{M}$  concentration of integrin binding sites.

60

61 A second reference measured collagen concentrations in breast tissue, finding  $\sim 50\text{mg/mL}$   
62 collagen(5). At a molecular weight of  $\sim 300\text{kDa}$ , this concentration is equivalent to  $170$   
63  $\mu\text{M}$ . Again, at seven integrin binding sites per collagen, this value implies a binding site  
64 concentration of  $1190\ \mu\text{M}$ .

65

66 Additionally, Fischbach et al. reported an adhesion ligand concentration of  $142\ \mu\text{M}$  in  
67 tumor-associated matrix(6).

68

69 Hence, given these methods to estimate an order of magnitude for the number of  
70 adhesion sites, and given numerous other papers that show at least tenfold changes in  
71 ECM component concentrations as a function of tissue, age, and disease, our range of  
72 adhesion ligand densities falls within a physiologically reasonable range.

73

### 74 **Hydrogel Mechanical Characterization**

75 Hydrogels were fabricated as described above at a thickness of 2mm and subjected to  
76 compression testing using a mechanical testing device (Instron). Gels were compressed at  
77 a strain rate of 1mm/min and the Young's Modulus was calculated as the best-fit slope of  
78 the first 5-15% of the resulting stress/strain curve. At 15% strain, the strain was held and  
79 the time required for the stress to decay by a factor of two was noted.

80

81 15% strain was chosen based on previous reports of cell-mediated strains in hydrogels  
82 and tissues. Material strains of 20-30% have been observed in the vicinity of fibroblasts  
83 in 3D hydrogel culture(7), while strains of 40% have been reported in the skin of the  
84 knee(8), 30% in muscles during contraction(9), and around 15% in the lung during  
85 breathing(10), suggesting that materials experience comparable levels of strain in cell-  
86 laden environments.

87

#### 88 **mMSC Cell Culture**

89

90 D1 mouse mesenchymal stem cells (MSCs) (ATCC) were encapsulated in the hydrogels  
91 during the mixing step at a concentration of 10 million cells/mL. Immediately before  
92 mixing, cells were rinsed and centrifuged twice to ensure the removal of any residual  
93 ECM components. After casting and punching, gels were placed in 24-well plates and  
94 cultured at 37 C in DMEM (Lonza) with 10% fetal bovine serum and 1%  
95 penicillin/streptomycin.

96

97 In order to confirm that the mMSCs used were functionally similar to those used in  
98 previous studies, we cultured mMSCs until the 40 hour time point in slow-relaxing, high  
99 ligand density 3kPa and 18kPa alginate hydrogels without differentiation supplements

100 and stained the cells for markers of adipogenic differentiation (lipid droplets, Oil Red O)  
101 and osteogenic differentiation (alkaline phosphatase, Fast Blue) (Fig. S4). We observed  
102 no staining for adipogenic differentiation and a slightly positive Fast Blue stain in the  
103 18kPa case, consistent with previous studies (3) and confirming the expected  
104 uncommitted nature of the MSCs and their differentiation potential.

105

### 106 **Live-Dead Staining**

107 Gels were treated with Life Technologies Live/Dead reagent per the manufacturer's  
108 specifications and were then transferred to a microscope slide with a custom-made PDMS  
109 well. A coverslip was placed over the hydrated gel and the gels were imaged on a Zeiss  
110 LSM 710 upright confocal microscope. Viability was quantified by computing the  
111 number of live and dead cells across five representative fields of view using ImageJ.

112

### 113 **MSC Differentiation Staining**

114 After 40 hours of culture, gels were removed from wells and washed twice with PBS  
115 containing calcium and magnesium (PBS++, Gibco) before fixation with 4%  
116 paraformaldehyde in PBS++ for 45 minutes on an orbital shaker. Gels were then washed  
117 and transferred into a 30% sucrose in PBS++ solution overnight at 4C. This solution was  
118 then diluted 1:1 with optimal cutting temperature compound (OCT) and gels were again  
119 soaked overnight. A final overnight incubation in 100% OCT was performed before  
120 freezing the gels on dry ice and storage at -80C. Cryosectioning was performed at a  
121 thickness of 30 microns and sections were dried at room temperature before staining.

122 Prior to each staining protocol, OCT was removed from the sections by washing twice  
123 with PBS++ for 5 minutes each wash.

124

125 For fast blue staining, sections were incubated for 15 min. in alkaline buffer (100mM  
126 Tris-HCl, 100mM NaCl, 0.1% Tween-20, 50mM MgCl<sub>2</sub>, pH 8.2). Sections were then  
127 incubated in a staining solution of: 500 µg/ml naphthol-AS- MX phosphate, 500 µg/ml  
128 Fast Blue BB salt in alkaline buffer for 45 minutes at room temperature. Sections were  
129 washed in alkaline buffer then PBS++ before imaging.

130

131 For oil red O staining, sections were equilibrated in 60% isopropanol for 5 minutes  
132 before staining with 1.8mg/mL oil red O in 60% isopropanol for 10 minutes. Sections  
133 were washed with PBS++ before imaging.

134

### 135 **Cell Retrieval from Gels**

136 After 40 hours of culture, gels were removed from the wells and placed into eppendorf  
137 tubes with 50mM EDTA in HEPES on ice for 10 minutes. An equal volume of trypsin-  
138 EDTA was then added to the tubes for an additional 5 minutes at 37C to ensure the  
139 removal of cells from the alginate chains. Cells were centrifuged and rinsed twice before  
140 proceeding to additional analysis.

141

### 142 **Cell Counting for Proliferation Analysis**

143 After cell retrieval as described above, cells were diluted per the manufacturer's  
144 instructions and counted on a Countess FLII automated cell counter (Life Technologies).  
145 Cell counts were compared to the original encapsulated cell numbers.

146

#### 147 **RNA-seq**

148 After cell retrieval as described above, cells were lysed and total RNA was extracted per  
149 manufacturer's instructions with the Qiagen RNeasy Micro kit. Samples were then  
150 submitted to the Harvard Medical School Biopolymers Facility, where mRNA  
151 enrichment and library preparation was performed. Individual samples were barcoded  
152 and run on either an Illumina HiSeq 2500 Rapid or an Illumina NextSeq. The data  
153 presented here represents two independent sequencing experiments that were pooled to  
154 yield the reported number of replicates per sample. Data will be deposited in the relevant  
155 databases before publication.

156

#### 157 **Statistical Methods**

158 Statistics for RNA-seq experiments are described in the RNA-seq Analysis section. For  
159 flow cytometry for the mMSC immunomodulation and MSC/HSPC crosstalk  
160 experiments, Igor Pro software was used to run one-way ANOVA, followed by a Tukey-  
161 post-hoc test.

162

#### 163 **mMSC RNA-seq Differential Expression Analysis**

164 Raw reads were aligned to the UCSC Genome Browser mm10 genome using  
165 Subread(11) and counts were aggregated per gene using FeatureCounts(12). After

166 aggregating read counts, we performed TMM normalization. Voom(13) and Limma(14)  
167 were then used to perform differential expression analysis using a multi-level factorial  
168 design. Batch was accounted for with an additional factor in the linear model.  
169 Differentially-expressed genes were defined as those with a fold-change of at least 2 and  
170 a BH-adjusted p-value of less than 0.05. For visualization and clustering, Combat was  
171 used to remove batch effects. TPM used for visualization and clustering was calculated  
172 after applying TMM normalization and variance stabilization to the Combat cleaned  
173 counts. Principal component analysis was coded manually using the log-transformed  
174 TPM for each biological replicate. qPCR on selected transcripts and material conditions  
175 mirrored the sequencing results (Fig. S16). Code used to run analysis is available upon  
176 request.

177

178 For Fig. 1 B,F, the number of DE genes for the reported comparisons was taken from the  
179 non-interaction terms of the linear model. We refer to these sets of genes as the  
180 “decoupled” genes.

181

182 For Fig. 1C,G, the number of DE genes for each comparison between conditions was  
183 found and plotted as a circle, with the area corresponding to the number of DE genes. For  
184 Fig. 1D,H, the intersection of the DE genes from each comparison and from the  
185 decoupled Venn Diagram were identified. Each intersection then represented a slice of  
186 the pie chart that represented all DE genes for that comparison. The resulting pie charts  
187 were plotted color-coded to the decoupled Venn Diagram gene sets.

188



189 **Neural Progenitor Production**

190 The human iPSC line 1016a (certified mycoplasma negative and karyotypically normal)  
191 was differentiated using a published cortical neuron protocol. Briefly, iPSC cells were  
192 dissociated to single cells and seeded into a spinning bioreactor at a concentration of  
193  $1 \times 10^6$  cells/mL in mTesk media (Stem Cell Technologies) supplemented with Rock  
194 inhibitor ( $10 \mu\text{M}$ ). On day 2, dual SMAD (SB431542,  $10 \mu\text{M}$ ; LDN193189,  $100 \text{nM}$ ) and  
195 Wnt inhibition (XAV939,  $2 \mu\text{M}$ ) were used to pattern the iPSC to a neural fate. From day  
196 3 to 10, the culture was transitioned from 100% KSR media (15% Knock Out Serum  
197 Replacement, KnockOut DMEM, 1x Glutamax, 1x NEAA, 1x Pen/Strep, 1x BME) to  
198 100% NIM media (DMEM-F12, 1x N2 supplement, 1x B27 -VitA Supplement, 1x  
199 Glutamax, 1x NEAA, 1x Pen/Strep). On day 10, the spheres were collected, washed in  
200 DPBS, and dissociated with 0.05% Trypsin. Once dissociated, cells were passed through  
201 a  $70 \mu\text{m}$  filter, counted with Trypan Blue, and plated at 50,000 cells per well. Cells were  
202 plated on a Greiner microclear 96 well plate coated with laminin, polyornithine, and  
203 fibronectin.

204

205 24 hours after plating, cells were fixed with 4% paraformaldehyde, permeabilized 0.1%  
206 Triton and blocked with 1% BSA, 5% FBS in DPBS. Primary antibodies were then added  
207 in blocking solution overnight at  $4^\circ\text{C}$  at the following concentrations: rbaPax6 1:600  
208 (Biolegend cat# 901301), ms $\alpha$ SOX2 1:200 (Cell Signaling Technology cat# 4900S). The  
209 next day, cells were washed and secondary antibodies, gt $\alpha$ rb Alexa 546 and gt $\alpha$ ms Alexa  
210 488, were used at 1:1000 and Hoechst nuclear stain was added at 1:5000 in DPBS.  
211 The stained plate was imaged on a Perkin Elmer Phenix with a 20x water objective. 30

212 wells, 20 fields each, were analyzed using the Columbus software package (Perkin  
213 Elmer). The percentage of SOX2+/Pax6+ cells were calculated by comparison with the  
214 total nuclei counted via Hoechst staining. 75% of cells were found to be Pax6+ and 60%  
215 were found to be SOX2+/Pax6+ (Fig. S8,9).

216

### 217 **hNPC Cell Culture**

218 After production, hNPCs were encapsulated in the hydrogels during the mixing step at a  
219 concentration of 5 million cells/mL. Immediately before mixing, cells were rinsed and  
220 centrifuged twice to ensure the removal of any residual ECM components. After casting  
221 and punching, gels were placed in 24-well plates and cultured at 37 C in NIM media  
222 (described above). Cells were stained for viability as described for mMSCs and were  
223 found to be highly viable and evenly distributed throughout the gel (Fig. S9).

224

### 225 **hNPC RNA-seq Differential Expression Analysis**

226 Raw reads were aligned to the UCSC Genome Browser hg38 genome using Subread(11)  
227 and counts were aggregated per gene using FeatureCounts(12). After aggregating read  
228 counts, we performed TMM normalization. Voom(13) and Limma(14) were then used to  
229 perform differential expression analysis using a multi-level factorial design.  
230 Differentially-expressed genes were defined as those with a fold-change of at least 4 and  
231 a BH-adjusted p-value of less than 0.05. TPM used for visualization and clustering was  
232 calculated after applying TMM normalization and variance stabilization. Principal  
233 component analysis was coded manually using the log-transformed TPM for each  
234 biological replicate.

235

### 236 **Weighted Gene Coexpression Network Analysis (WGCNA)**

237 WGCNA(15) was run on the Combat-cleaned TPM data and the topological overlap  
238 matrix was calculated using an unsigned network and a soft power of 10. Modules were  
239 defined using the dynamic tree cut algorithm. Module significance for stiffness, stress  
240 relaxation, and ligand density was computed for each module by correlating the  
241 expression of module member genes each parameter encoded as low (0) or high (1) and  
242 taking the average gene significance for that module. The most significant genes for each  
243 module were found using the NetworkScreening function and were defined as those  
244 having high module membership and high intra-modular connectivity. For the hNPCs, a  
245 soft power of 20 was used.

246

### 247 **Metacore Network Analysis and Visualization**

248

249 For Figure 3, the member genes for the three modules of interest were used as the seed  
250 genes to identify inferred PathwayMaps (Fig. 3b). In Fig. 3c, the member genes from the  
251 three modules of interest were combined and used as seeds for the Metacore  
252 AnalyzeNetwork function. This function yields sub-networks that are ranked by an  
253 enrichment score. We selected and merged the top three sub-networks to arrive at the  
254 network shown in Fig. 3c, which represents a putative version of a network that captures  
255 material-sensing behaviors across our parameters of interest. In Fig. 3d, the member  
256 genes corresponding to modules with high or low module-module correlations were used

257 as seeds and the PathwayMap enrichment analysis was performed. P-values are BH-  
258 adjusted.

259

260 For the drug target analysis, DE genes for hNPCs corresponding to stress relaxation,  
261 stiffness, and ligand density were pooled and fed into the Drug Target pipeline in  
262 Metacore. The drug hits in the “therapeutic drug-target interactions” list were taken.

263

264

### 265 **qPCR**

266 Cells were retrieved from gels as described above and total RNA was extracted using the  
267 Qiagen RNeasy micro kit following manufacturer’s instructions. Reverse transcription  
268 was carried out using BioRad iScript Advanced cDNA synthesis kit and PrimePCR  
269 validated primers (Table S1) along with BioRad sso Advanced Universal SYBR Green  
270 Supermix were used for the qPCR assay. Samples were run on a BioRad QFX96 at the  
271 Harvard Center for Systems Biology Bauer Core facility. Relative expression was  
272 calculated from normalized  $\Delta C_t$  values using a GAPDH housekeeping gene.

273

### 274 **MSC-HSPC Coculture Experiment**

275 HSPCs were isolated from the tibia, femur, and pelvis of 6-12 week old wild type  
276 C57BL/6 mice. Isolated bones were abraded to remove muscle tissue, crushed in a mortar  
277 and pestle, and strained through a 70 um mesh filter. Lin- ckit+ sca1+ (LKS) cells were  
278 isolated by first staining for these markers (Pacific Blue anti-mouse lineage cocktail  
279 CAT: 133310, PE anti-mouse Ly-6A/E (Sca-1) CAT: 108108, APC anti-mouse CD117

280 (c-kit) CAT: 105812) and then sorting using a 5-laser FACS Aria (Fig. S19). Alginate  
281 hydrogels were fabricated as indicated above at a thickness of 0.5mm and placed at the  
282 bottom of a well of a 12 well plate coated with pluronic in order to prevent rogue cell  
283 adhesion. A Transwell membrane was placed in each well and mouse HSPCs were  
284 seeded on the membrane. DIs were cocultured with hematopoietic cells in StemSpan  
285 SFEM (StemCell Technologies) supplemented with 10% FBS; 1%  
286 penicillin/streptomycin; and 10 ng/mL recombinant mouse SCF, FLT3L, and interleukin-  
287 7 (BioLegend). Media change was performed every two days, and the coculture was  
288 terminated after one week. Analytic flow cytometry was performed using a four-laser  
289 LSR II with diva software (Becton Dickinson). Cells were stained for the above  
290 antibodies as well as calcein-AM (Invitrogen) and CD45 (PE/Cy7 anti-mouse CD45  
291 CAT: 103113). Analysis was performed using FlowJo 8.7 software.

292

### 293 **Conditioned Media Experiment**

294 Alginate hydrogels containing mMSCs were fabricated as indicated above for the  
295 coculture experiment, but without the Transwell insert and HSPCs. For two days, cells  
296 were cultured in DMEM (Lonza) with 10% fetal bovine serum and 1%  
297 penicillin/streptomycin, after which they were washed 3 times with PBS to remove  
298 residual serum and subsequently cultured in serum-free DMEM with 1%  
299 penicillin/streptomycin for one day. The media was collected after 24 hours and  
300 concentrated using a centrifugal filter (Pall). This conditioned media was used per the  
301 manufacturer's specifications in Abcam's ab193659 mouse 96-target cytokine array and  
302 chemiluminescence was read on a FluorChem M imager. Spot sizes for each cytokine

303 were measured using ImageJ and sizes were averaged over duplicates included on each  
304 array.

305

306 To check the general correspondence between the RNA-seq data and the cytokine array,  
307 we calculated average expression for the fifteen cytokines common to both the array and  
308 the RNA-seq dataset. Of those, we found six to qualify as differentially expressed. Since  
309 the difference in sensitivity between the array and RNA-seq data does not allow for a  
310 direct comparison, we sought to verify the general trends by asking, within this set of DE  
311 cytokines, for how many of the cytokines was the highest expression condition consistent  
312 between the array and RNA-seq. We found that in five of six cytokines, the highest  
313 conditioned matched (Fig. S 18).

314

315 **Supplemental Figures**

316

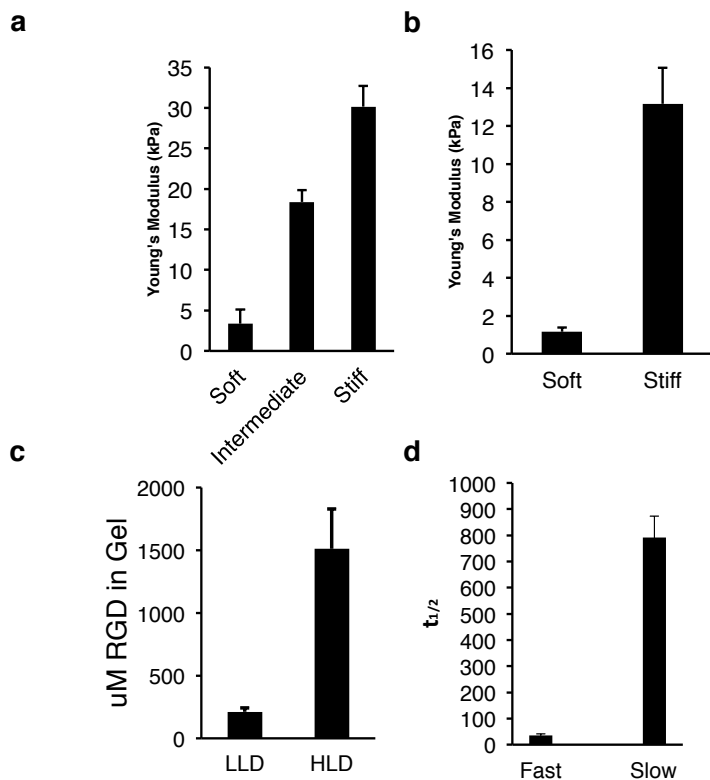

317

318 **Figure S1:** Characterization of RGD-coupled alginate hydrogels

319 a) Young's Moduli of alginate hydrogels used for mMSC culture. Mean + S.D.

320 b) Young's Moduli of alginate hydrogels used for hNPC culture. Mean + S.D.

321 c) Quantification of RGD coupling per LavaPep assay. Mean + S.D.

322 d) Time to achieve 50% relaxation of maximal stress in hydrogels when held at 15%

323 strain. Mean + S.D.

324

325

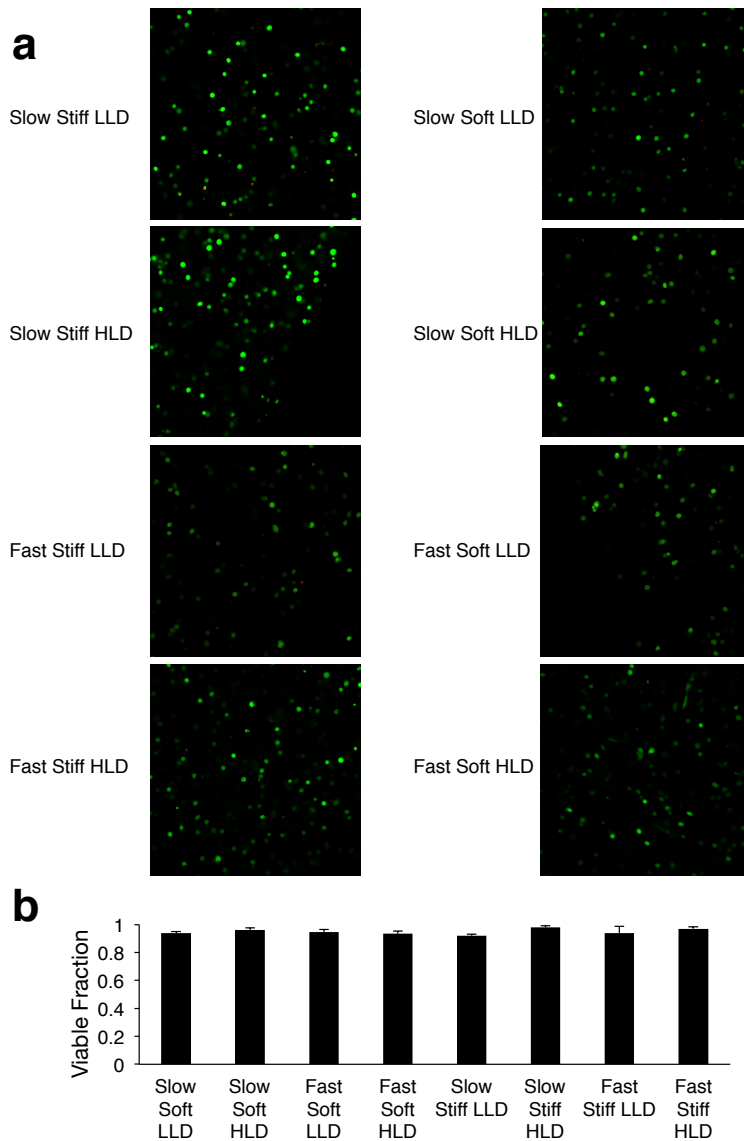

326

327

**Figure S2:** Viability and distribution of MSCs in hydrogels

328

a) Live/Dead staining of MSCs in hydrogels. Live cells appear green and dead

329

cells appear red.

330

b) Quantification of fraction of viable cells in hydrogels, computed from five

331

representative fields of view for each gel. Cells were segmented and counted

332

using ImageJ. Mean + S.D.

333



334

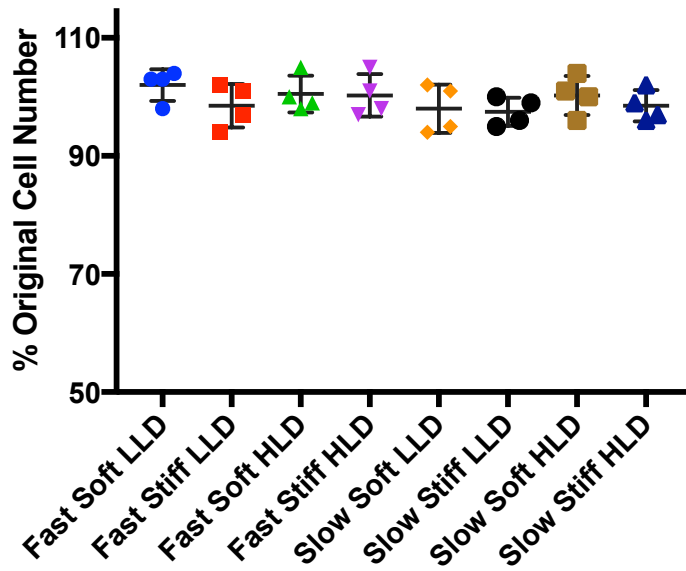

335

336 **Figure S3:** Percentage of original mMSC cell numbers after 2 days in culture in alginate

337 hydrogels. No statistical significance found with ANOVA. Error bars, S.D.

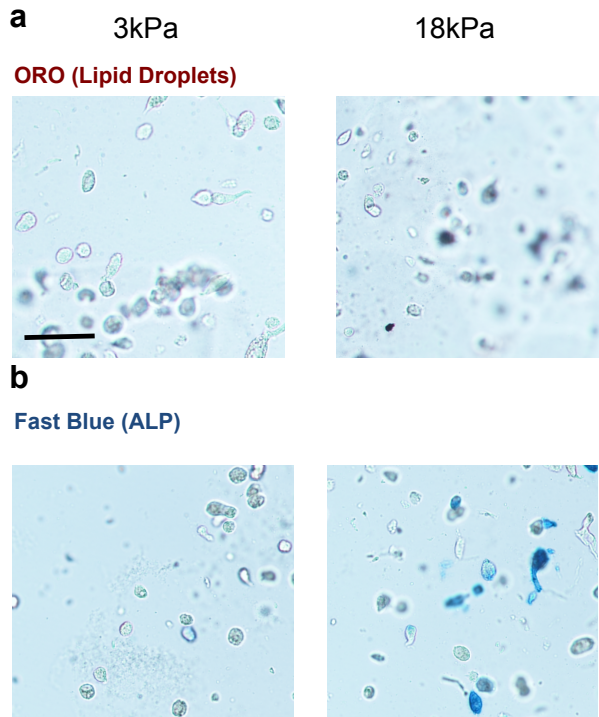

338

339 **Figure S4:** Differentiation staining of mMSCs at 40 hours. A) Oil Red O staining for  
340 lipid droplets in mMSCs in sections of soft and stiff, high ligand density, slow-relaxing  
341 hydrogels. Scale bar - 60 $\mu$ m. B) A) Fast Blue staining for alkaline phosphatase in  
342 mMSCs in sections of soft and stiff, high ligand density, slow-relaxing hydrogels. Scale  
343 bar - 60 $\mu$ m.

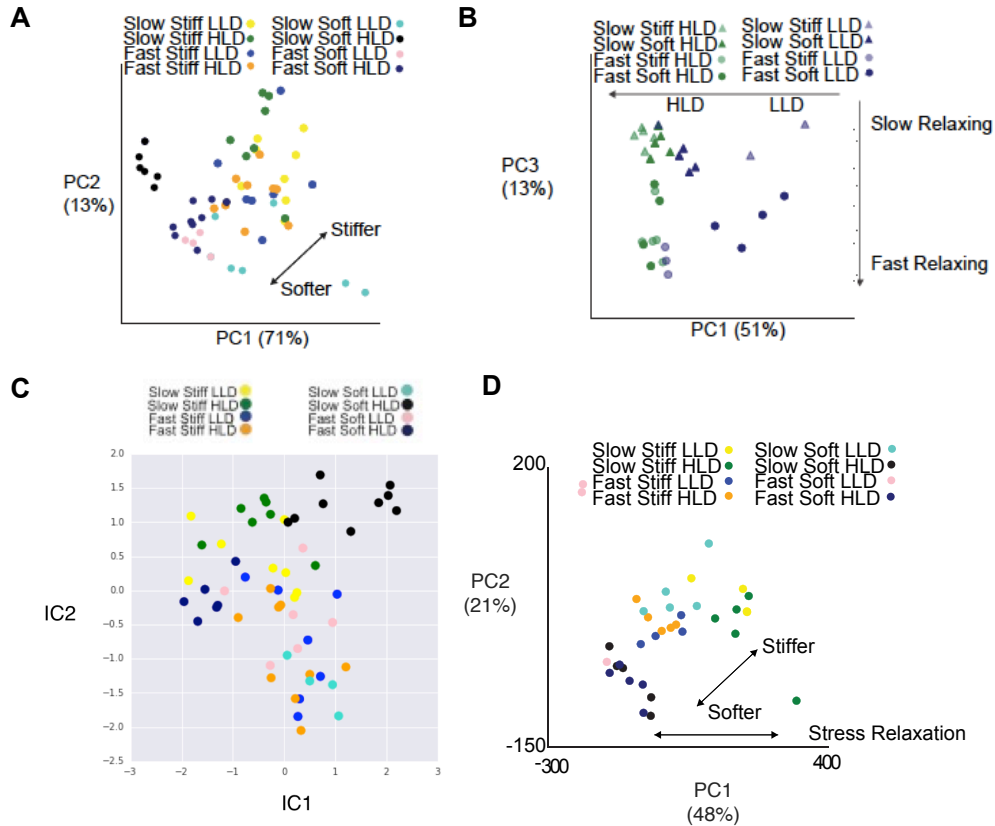

344  
345

**Figure S5: Clustering analysis of MSC RNA-seq data**

346  
347  
348  
349  
350  
351  
352  
353  
354  
355

a) Principal component analysis of gene expression in mMSCs across all replicates for each material with 30kPa as the stiff material. PC1, first principal component, etc. Light purple triangle, Slow Stiff Low Ligand Density. Light green triangle, Slow Stiff High Ligand Density. Light purple circle, Fast Stiff Low Ligand Density. Light green circle, Fast Stiff High Ligand Density. Dark purple triangle, Slow Soft Low Ligand Density. Dark green triangle, Slow Soft High Ligand Density. Dark purple circle, Fast Soft Low Ligand Density. Dark green circle, Fast Soft High Ligand Density. Each point represents a sequencing replicate. Arrows represent directions along which the variation for that specific substrate property is captured.

356 b) Principal component analysis of gene expression in mMSCs across all replicates  
357 for each material with 18kPa as the stiff material. Yellow, Slow Stiff Low Ligand  
358 Density. Green, Slow Stiff High Ligand Density. Purple, Fast Stiff Low Ligand  
359 Density. Orange, Fast Stiff High Ligand Density. Turquoise, Slow Soft Low  
360 Ligand Density. Black, Slow Soft High Ligand Density. Pink, Fast Soft Low  
361 Ligand Density. Navy, Fast Soft High Ligand Density. Each point represents a  
362 sequencing replicate. Arrows represent directions along which the variation for  
363 that specific substrate property is captured.

364 c) Independent component analysis of gene expression in mMSCs across all  
365 replicates for each material. IC1 represents the first independent component and  
366 IC2 represents the second independent component. Yellow, Slow Stiff Low  
367 Ligand Density. Green, Slow Stiff High Ligand Density. Purple, Fast Stiff Low  
368 Ligand Density. Orange, Fast Stiff High Ligand Density. Turquoise, Slow Soft  
369 Low Ligand Density. Black, Slow Soft High Ligand Density. Pink, Fast Soft Low  
370 Ligand Density. Navy, Fast Soft High Ligand Density. Each point represents a  
371 sequencing replicate.

372 d) Principal component analysis of gene expression in hNPCs across all replicates  
373 for each material. PC1, first principal component, etc. Yellow, Slow Stiff Low  
374 Ligand Density. Green, Slow Stiff High Ligand Density. Purple, Fast Stiff Low  
375 Ligand Density. Orange, Fast Stiff High Ligand Density. Turquoise, Slow Soft  
376 Low Ligand Density. Black, Slow Soft High Ligand Density. Pink, Fast Soft Low  
377 Ligand Density. Navy, Fast Soft High Ligand Density. Each point represents a

378 sequencing replicate. Arrows represent directions along which the variation for  
379 that specific substrate property is captured.

380

381

Stiff Hydrogels

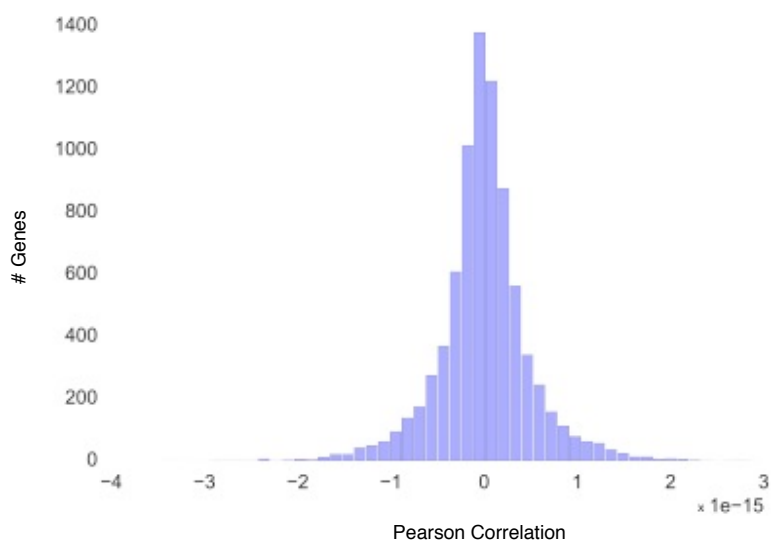

Soft Hydrogels

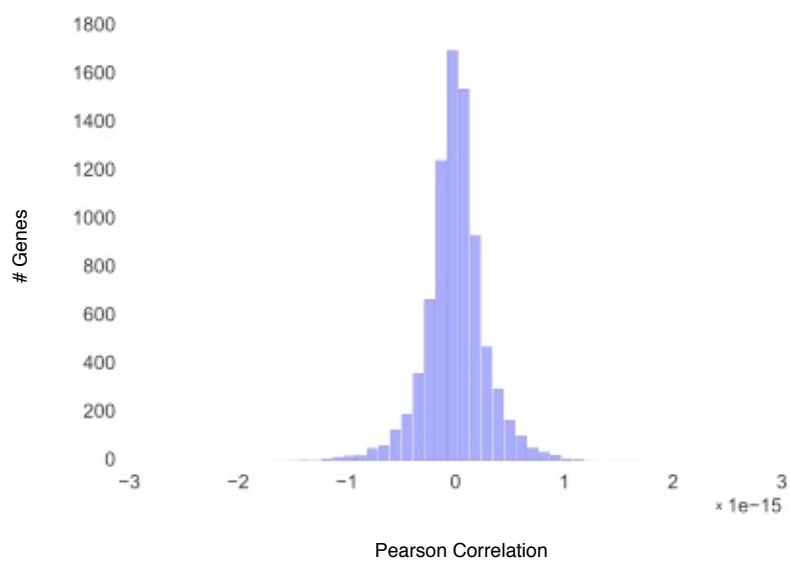

382

383

**Fig. S6:** Distributions across all genes in mMSCs of Pearson correlations of gene

384

expression as a function of hydrogel Ca concentration for soft and stiff hydrogels. All

385

replicates were used to calculate the correlations.

386

387

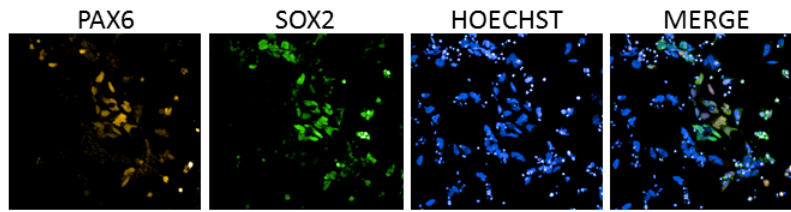

388

389 **Figure S7:** Characterization of hNPC markers. Representative images of staining

390 for Pax6 and Sox2 24 hours after retrieval from spheroid culture, and thus

391 representative of the cell state prior to encapsulation in hydrogels.

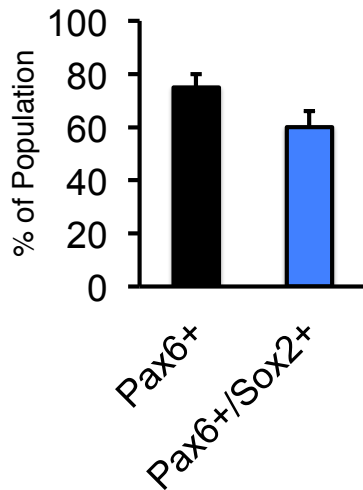

392

393 **Figure S8:** Quantification of hNPC markers in population. Quantification from

394 representative images of staining for Pax6 and Sox2 24 hours after retrieval from

395 spheroid culture, and thus representative of the cell state prior to encapsulation in

396 hydrogels. Mean +/- S.D

397

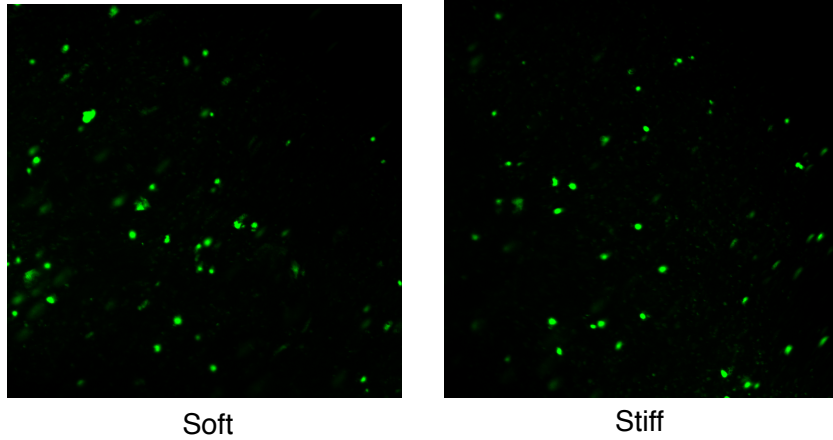

398

399

400

401

402

403

**Figure S9:** Viability and distribution of hNPCs encapsulated in hydrogels two days post encapsulation. Representative confocal images show live cells staining green and dead cells staining red, along with the distribution of mostly single cells.



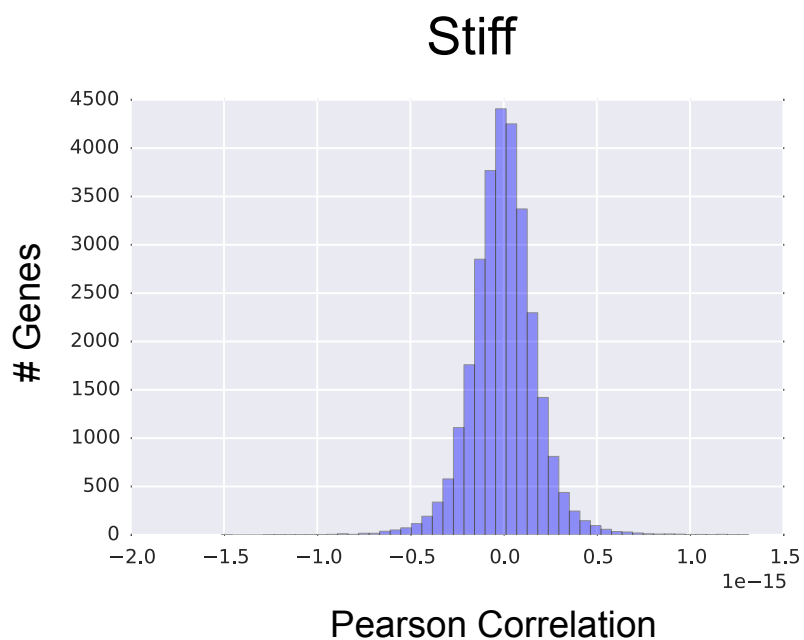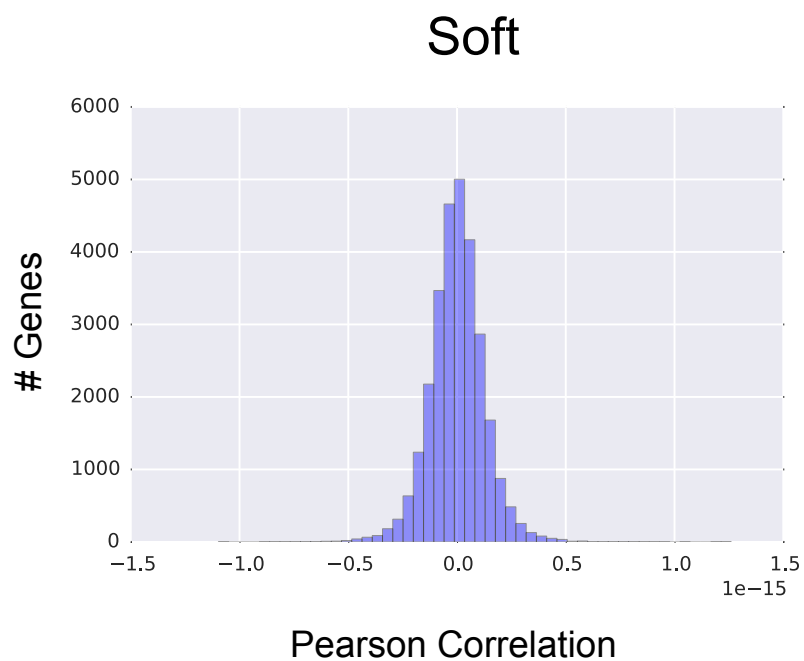

404

405 **Fig. S10:** Distributions across all genes in hNPCs of Pearson correlations of gene  
406 expression as a function of hydrogel Ca concentration for soft and stiff hydrogels. All  
407 replicates were used to calculate the correlations.

408

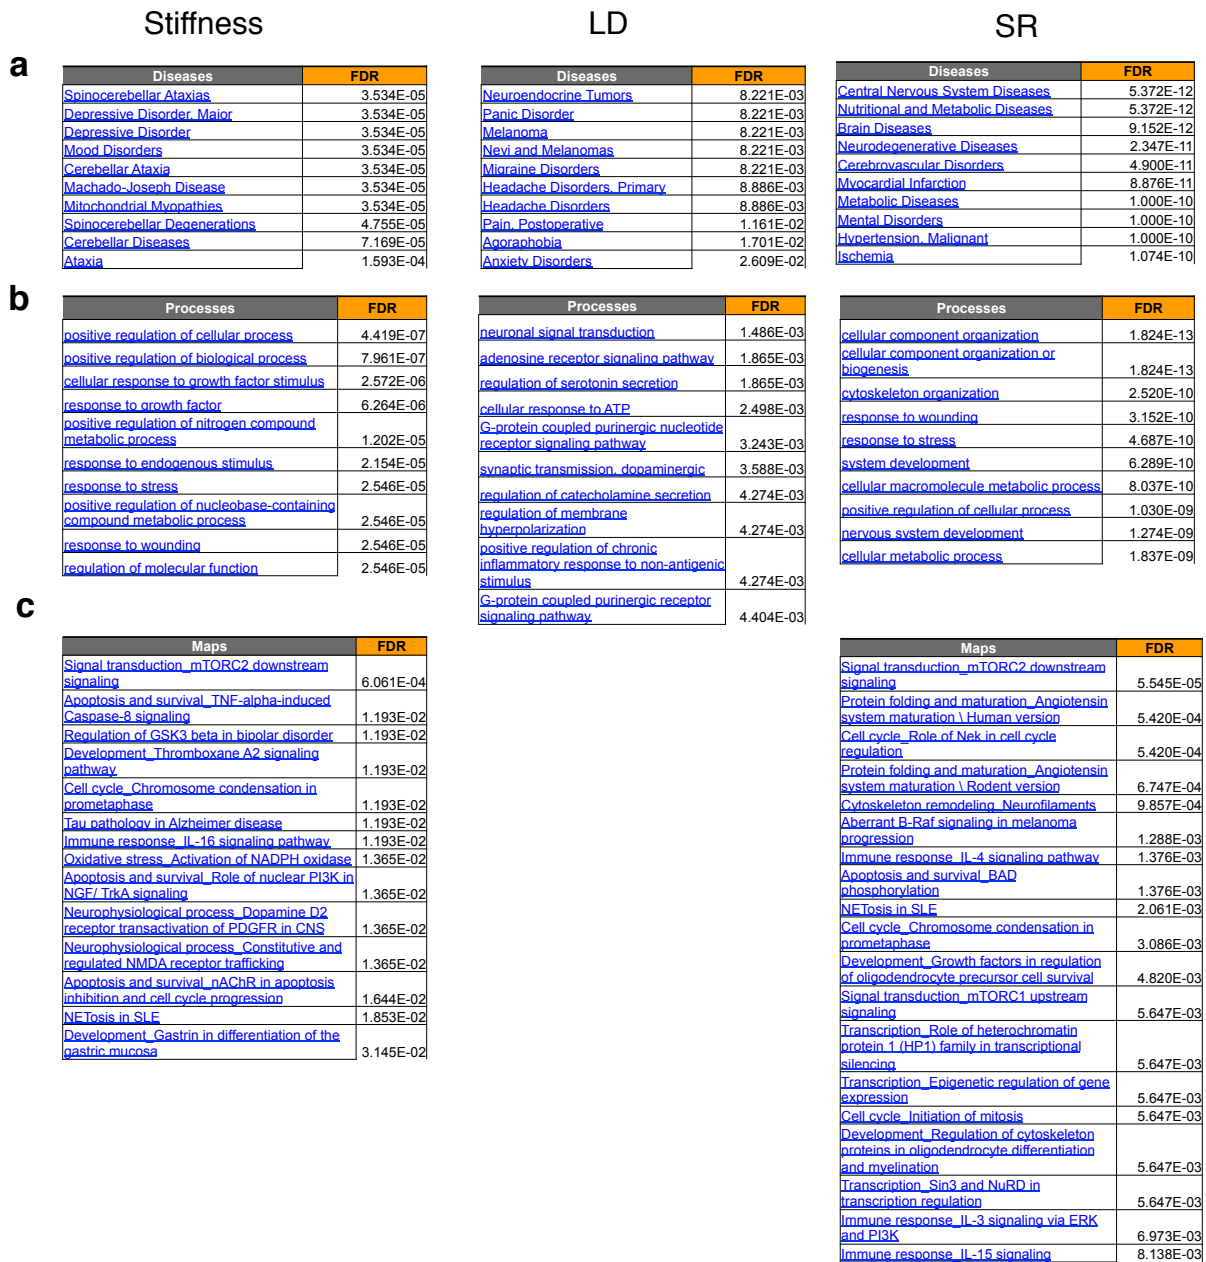

410

411 **Figure S11:** Enrichment analysis of hNPC DE genes.

- 412 a) Top 10 diseases significantly enriched in the DE genes for each of the material  
 413 parameters of interest.  
 414 b) Top gene ontology processes significantly enriched in the DE genes for each of  
 415 the material parameters of interest.  
 416 c) Top Metacore Pathway Maps significantly enriched in the DE genes for  
 417 stiffness and stress relaxation. Statistics account for multiple hypotheses and were  
 418 calculated automatically with Metacore's enrichment function.

| <u>Drug</u>                        | <u>Target</u> |
|------------------------------------|---------------|
| Acetazolamide intracellular        | CA3           |
| Carbonic anhydrase XI              | CA11          |
| Ridaforolimus intracellular        | MTOR          |
| Docetaxel intracellular            | TUBB          |
| Bupivacaine extracellular region   | KCNA5         |
| Rivociclib intracellular           | CDK1          |
| GW274150 intracellular             | NOS2          |
| Setiptiline extracellular region   | ADRA2C        |
| Priralfinamide intracellular       | MAOB          |
| Resatorvid extracellular region    | TLR4          |
| E5531 extracellular region         | TLR4          |
| AZD8055 intracellular              | MTOR          |
| XEN-D0101 extracellular region     | KCNA5         |
| Deriglidole extracellular region   | ADRA2C        |
| Dalfampridine extracellular region | KCNA5         |
| Ketamine extracellular region      | GRIN3A        |
| Gemfibrozil intracellular          | LPL           |
| Efaroxan extracellular region      | ADRA2C        |
| Idazoxan extracellular region      | ADRA2C        |
| Vernakalant extracellular region   | KCNA5         |
| Temsirolimus intracellular         | MTOR          |
| Memantine extracellular region     | GRIN3A        |
| Everolimus intracellular           | MTOR          |
| Sorafenib intracellular            | RAF1          |
| Azepexole extracellular region     | ADRA2C        |
| Fipamezole extracellular region    | ADRA2C        |
| Naphazoline extracellular region   | ADRA2C        |
| SL251188 intracellular             | MAOB          |
| Lusaperidone extracellular region  | ADRA2C        |
| Sirolimus intracellular            | MTOR          |
| Brimonidine extracellular region   | ADRA2C        |
| Piperoxan extracellular region     | ADRA2C        |
| OPC28326 extracellular region      | ADRA2C        |
| Besipirdine extracellular region   | ADRA2C        |
| Guanethidine extracellular region  | ADRA2C        |
| Mianserin extracellular region     | ADRA2C        |
| Dipivefrine extracellular region   | ADRA2C        |
| Roniciclib intracellular           | CDK1          |
| Suramin extracellular region       | PDGFB         |
| Yohimbine extracellular region     | ADRA2C        |
| Ibrolipim extracellular region     | LPL           |
| Rasagiline intracellular           | MAOB          |
| Tramazoline extracellular region   | ADRA2C        |
| AT7519M intracellular              | CDK1          |
| Apraclonidine extracellular region | ADRA2C        |
| R547 intracellular                 | CDK1          |
| Alvocidib intracellular            | CDK1          |
| (R)-Selegiline intracellular       | MAOB          |
| Nialamide intracellular            | MAOB          |

420

421

422

423

**Figure S12:** Drugs targeting hNPC DE genes. Using Metacore's drug mapping tool, DE genes corresponding to stress relaxation, stiffness, and ligand density were aggregated and interrogated, yielding these 48 drugs that target genes in that list.

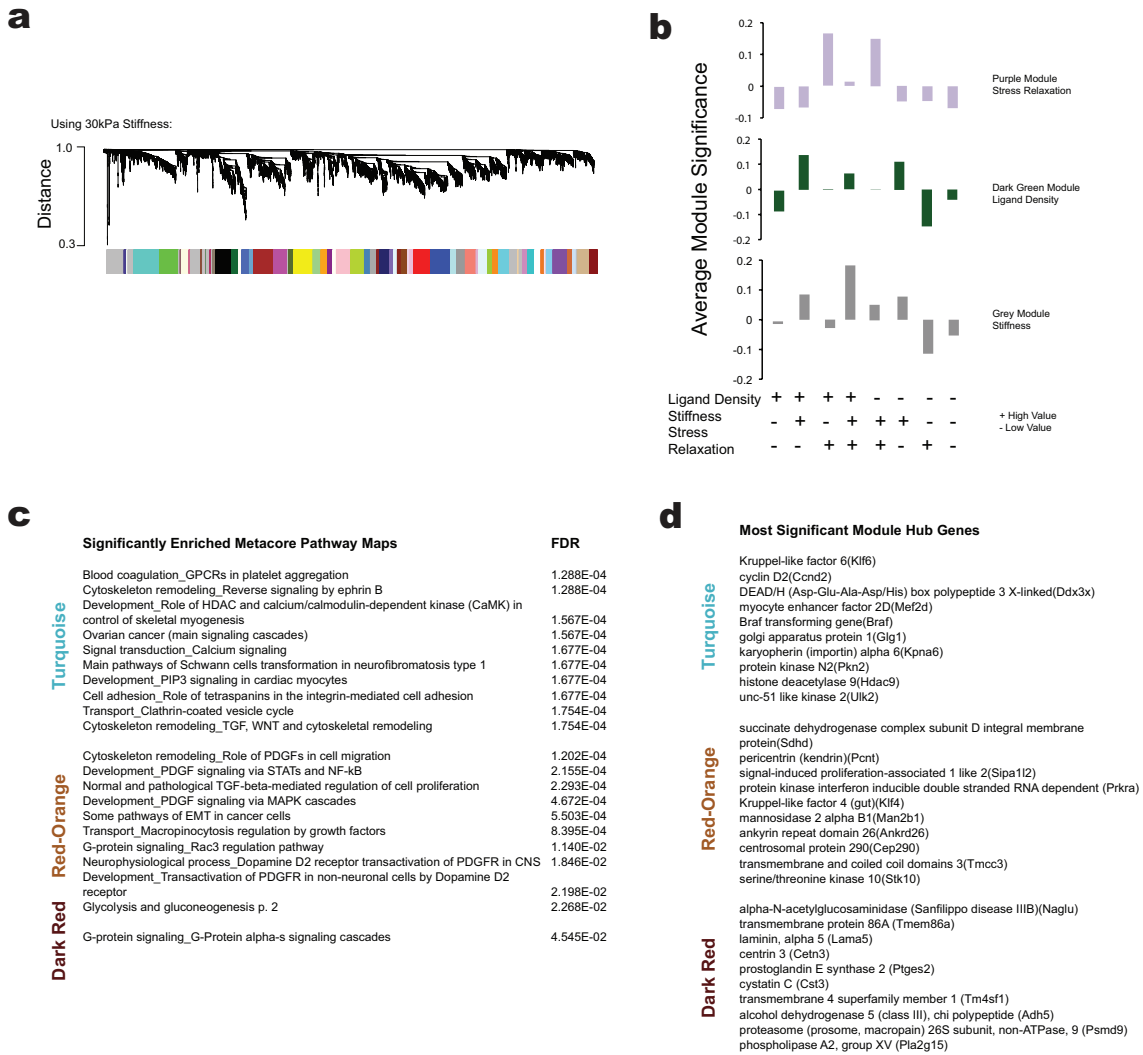

424

425

426

**Figure S13:** Supplementary WGCNA analysis for mMSCs.

427

a) Cluster dendrogram of gene expression showing module identification from

428

WGCNA analysis using an unsigned network and a soft thresholding parameter of 10 for the dataset containing 30kPa hydrogels as the stiffest condition.

429

b) Selection of modules that most closely map to ligand density, stiffness, and stress

430

relaxation for the dataset containing 30kPa hydrogels as the stiffest condition.

431

Average module significance is plotted as a function of each material, showing

432

the lack of correspondence between the module and that parameter of interest.

433

c) Significantly enriched Metacore Pathway Maps from Figure 3 that uses 18kPa as

434

the stiff condition in the WGCNA analysis. The enrichment analysis was carried

435 out using the genes for each module. The turquoise, red-orange, and dark red  
436 modules correspond to ligand density, stiffness, and stress relaxation,  
437 respectively.

438 d) Significantly enriched module hub genes from Figure 3 that uses 18kPa as the  
439 stiff condition in the WGNCA analysis as identified using the WGCNA  
440 AnalyzeNetwork function. The genes represent those in each module that have the  
441 highest module membership and intramodule connectivity scores. The turquoise,  
442 red-orange, and dark red modules correspond to ligand density, stiffness, and  
443 stress relaxation, respectively.

444

445

446

### Stress Relaxation

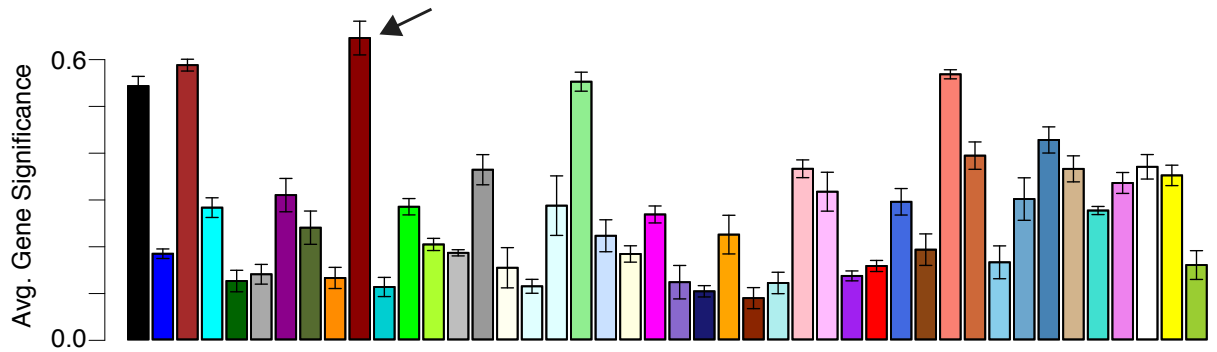

### Stiffness

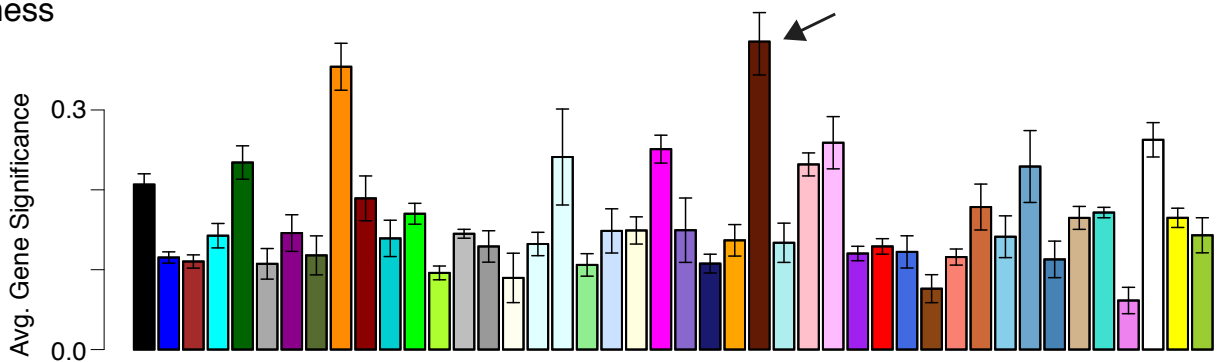

### Ligand Density

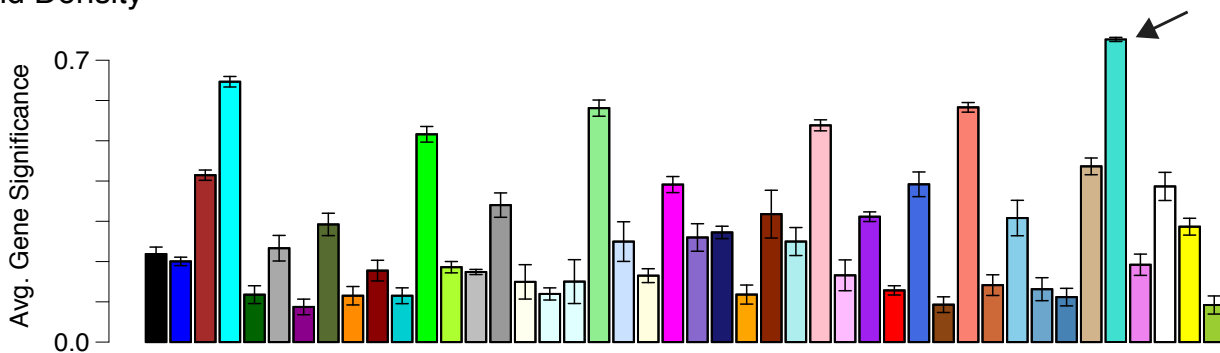

447  
448 **Figure S14:** Identification of WGCNA modules corresponding to material parameter of  
449 interest in mMSCs. Average gene significance for each module with respect to each  
450 parameter. The most significant modules were chosen for further analysis and are  
451 highlighted with arrows. Mean +/- S.D.

452

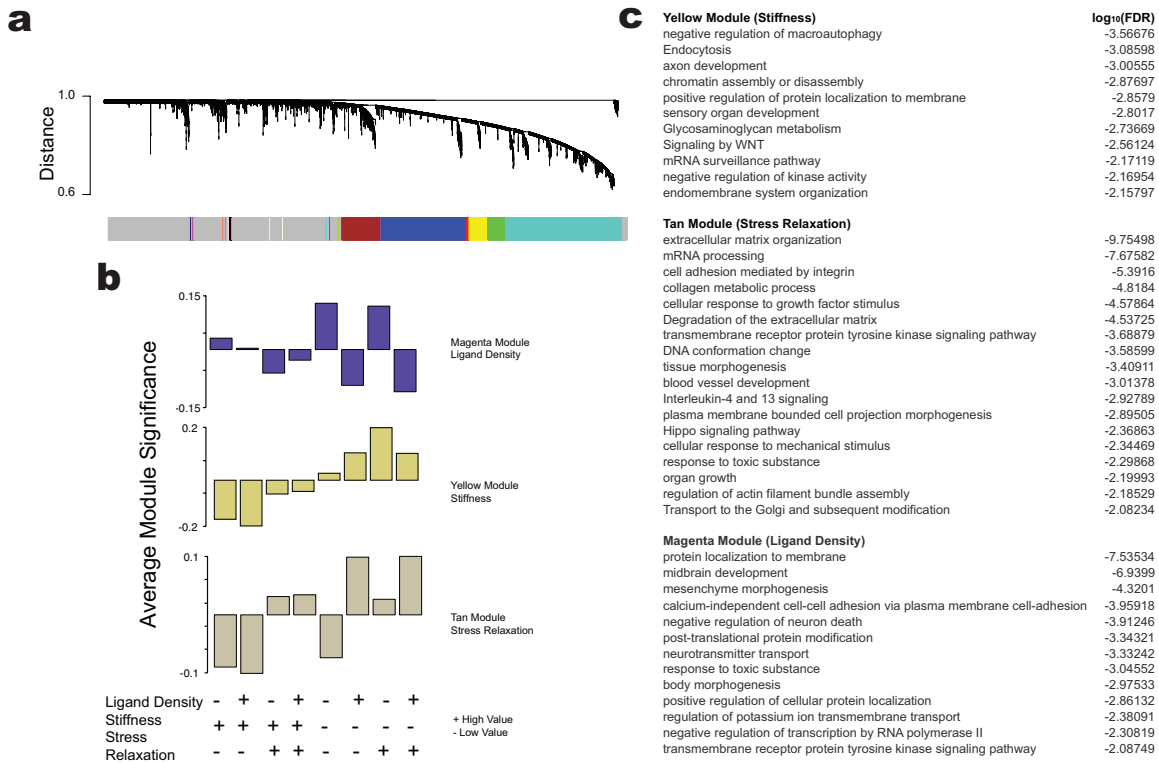

453

454 **Figure S15:** WGCNA analysis of hNPC data. A) Cluster dendrogram identifying colored  
 455 modules of highly coexpressed genes in the hNPC dataset. B) The correspondence of the  
 456 three modules showing the highest correlations to our parameters of interest. Each +/-  
 457 corresponds to the low or high value of each material property and the average  
 458 normalized expression for each module in each of the eight materials is plotted. C)  
 459 Metacore PathwayMaps corresponding to the three modules identified in B), along with  
 460 each term's associated FDR.

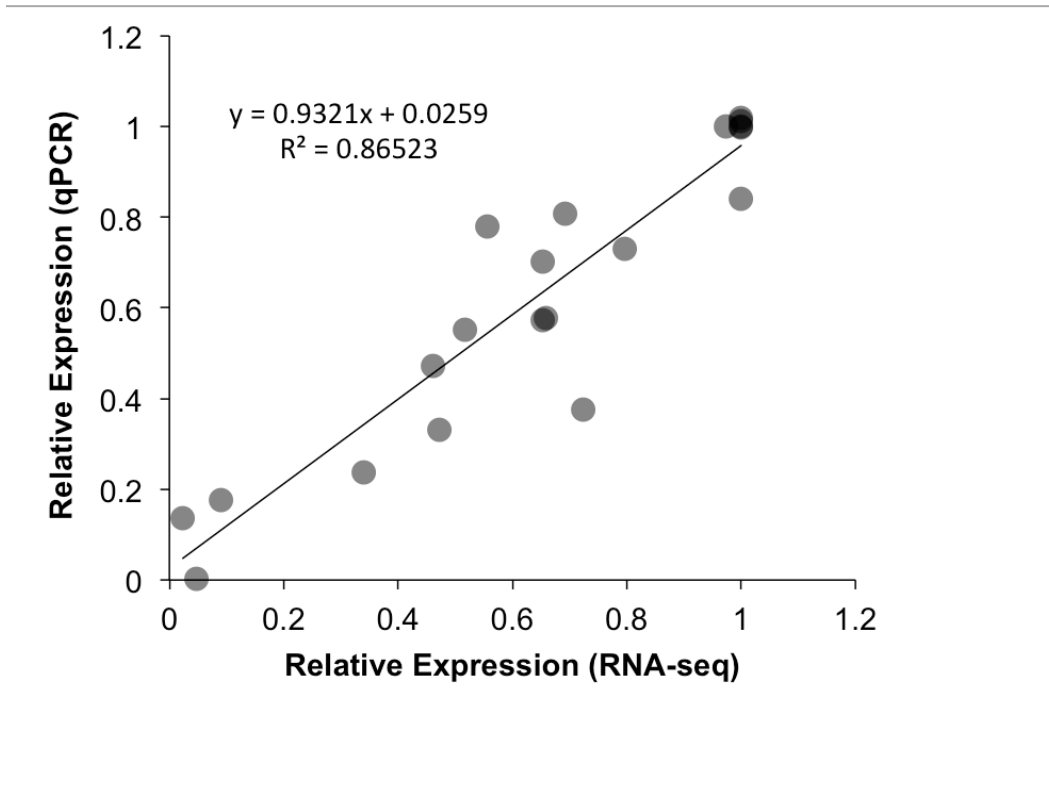

461

462 **Fig. S16:** Validation of mMSC RNA-seq results by qPCR. Sampled DE genes for qPCR  
 463 analysis were Ptges2, E2F7, Bmp3, Zyx, Klf6. This validation experiment was carried  
 464 out in slow-relaxing 3kPa LLD, slow-relaxing 18kPa LLD, slow-relaxing 3kPa HLD, and  
 465 slow-relaxing 18kPa HLD hydrogels. Each data point represents a specific transcript for a  
 466 specific material.

467

468



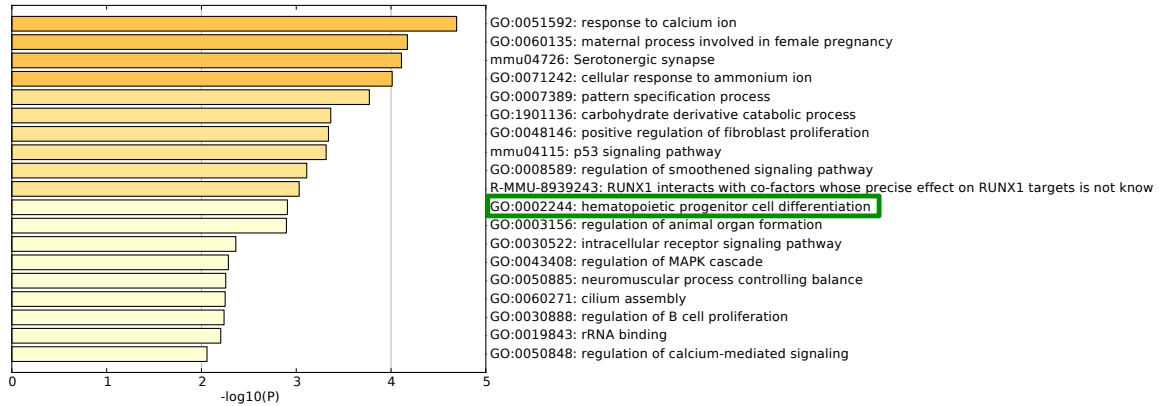

469

470 **Figure S17: Gene Ontology results from the top stiffness-related mMSC WGCNA**

471 **module.** The top 100 most enriched genes in the red-orange module were used as inputs

472 for a gene ontology analysis using Metascape. The plot depicts p-values for each term as

473 determined by Metascape.

474

| <u>Cyokines<br/>Common to<br/>RNAseq and Array</u> | <u>Cyokines DE in<br/>RNAseq data</u> | <u>Cyokines with<br/>Matching Highest<br/>Conditions (5/6)</u> |
|----------------------------------------------------|---------------------------------------|----------------------------------------------------------------|
| Mmp2                                               | Mmp2                                  | Mmp2                                                           |
| Ccl5                                               | Opn                                   | Opn                                                            |
| Opn                                                | Tnfrsf1b                              | Tnfrsf1a                                                       |
| Tnfrsf1b                                           | Tnfrsf1a                              | Mcp1                                                           |
| Tnfrsf1a                                           | Mcp1                                  | Cxcl12                                                         |
| Cx3cl1                                             | Cxcl12                                |                                                                |
| Vcam1                                              |                                       |                                                                |
| Mcp1                                               |                                       |                                                                |
| Ccl17                                              |                                       |                                                                |
| Il13                                               |                                       |                                                                |
| Lix1l                                              |                                       |                                                                |
| Il4                                                |                                       |                                                                |
| Selp                                               |                                       |                                                                |
| Cxcl12                                             |                                       |                                                                |
| Lepr                                               |                                       |                                                                |

**Cyokines with  
Mismatched  
Highest  
Conditions (1/6)**  
Tnfrsf1b

475

476 **Figure S18:** Correspondence between cytokine array and RNAseq data. Of the cytokines  
477 common to both RNAseq and the cytokine array, those showing differential expression in  
478 RNAseq were selected. Since there is a mismatch in sensitivity and granularity between  
479 the array and RNAseq that prevents direct comparison, the material conditions that  
480 corresponded to the highest expression of each cytokine were found and compared.

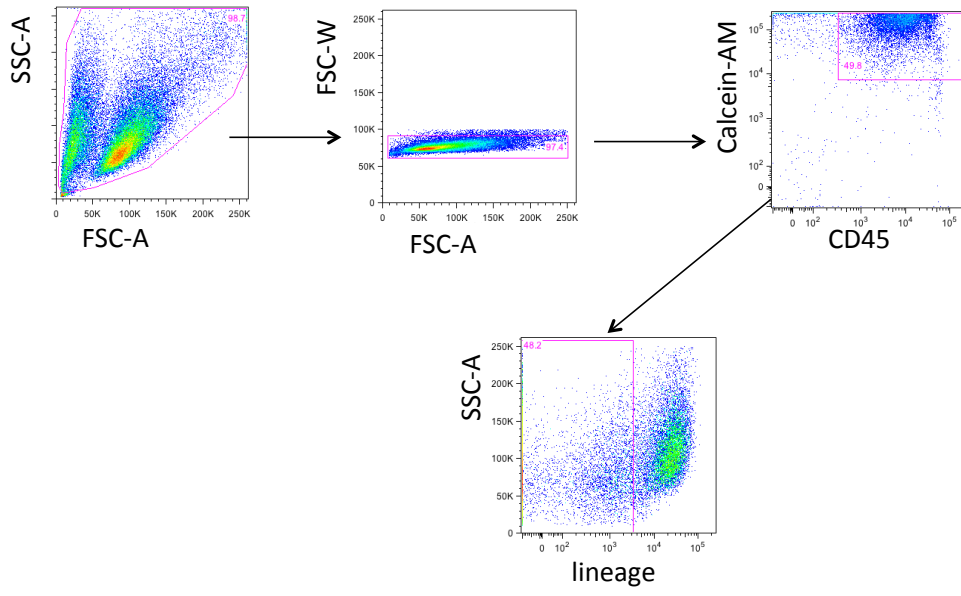

481

482 **Figure S19:** Example gating strategy for CD45+/lin- cells.

483

484  
485  
486  
487

**Supplemental Tables**

| Supplier | Unique Assay ID | Gene   |
|----------|-----------------|--------|
| BioRad   | qMmuCID0005139  | Ptges2 |
| BioRad   | qMmuCID0018612  | Gapdh  |
| BioRad   | qMmuCID0008584  | Bmp3   |
| BioRad   | qMmuCID0010274  | E2F7   |
| BioRad   | qMmuCID0006114  | Zyx    |
| BioRad   | qMmuCID0016866  | Klf6   |

488  
489  
490  
491

**Table S1:** PCR primers used for RNAseq validation

492 **References**

- 493 1. Alsberg E, Anderson KW, Albeiruti A, Franceschi RT, & Mooney DJ (2001)  
494 Cell-interactive Alginate Hydrogels for Bone Tissue Engineering. *Journal of*  
495 *Dental Research* 80(11):2025-2029.
- 496 2. Chaudhuri O, *et al.* (2016) Hydrogels with tunable stress relaxation regulate  
497 stem cell fate and activity. *Nat Mater* 15(3):326-334.
- 498 3. Huebsch N, *et al.* (2010) Harnessing traction-mediated manipulation of the  
499 cell/matrix interface to control stem-cell fate. *Nat Mater* 9(6):518-526.
- 500 4. Johnson TD, *et al.* (2016) Quantification of decellularized human myocardial  
501 matrix: A comparison of six patients. *PROTEOMICS – Clinical Applications*  
502 10(1):75-83.
- 503 5. Taroni P, *et al.* (2015) Breast Tissue Composition and Its Dependence on  
504 Demographic Risk Factors for Breast Cancer: Non-Invasive Assessment by  
505 Time Domain Diffuse Optical Spectroscopy. *PLoS ONE* 10(6):e0128941.
- 506 6. Fischbach C, *et al.* (2009) Cancer cell angiogenic capability is regulated by 3D  
507 culture and integrin engagement. *Proceedings of the National Academy of*  
508 *Sciences* 106(2):399-404.
- 509 7. Legant WR, *et al.* (2010) Measurement of mechanical tractions exerted by  
510 cells within three-dimensional matrices. *Nature methods* 7(12):969-971.
- 511 8. Wessendorf AM & Newman DJ (2012) Dynamic Understanding of Human-  
512 Skin Movement and Strain-Field Analysis. *IEEE Transactions on Biomedical*  
513 *Engineering* 59(12):3432-3438.
- 514 9. Gordon AM, Huxley AF, & Julian FJ (1966) The variation in isometric tension  
515 with sarcomere length in vertebrate muscle fibres. *The Journal of Physiology*  
516 184(1):170-192.
- 517 10. Huh D, *et al.* (2010) Reconstituting Organ-Level Lung Functions on a Chip.  
518 *Science* 328(5986):1662.
- 519 11. Liao Y, Smyth GK, & Shi W (2013) The Subread aligner: fast, accurate and  
520 scalable read mapping by seed-and-vote. *Nucleic Acids Research* 41(10):e108.
- 521 12. Liao Y, Smyth GK, & Shi W (2013) featureCounts: an efficient general-purpose  
522 read summarization program. *Bioinformatics*).
- 523 13. Law CW, Chen Y, Shi W, & Smyth GK (2014) voom: precision weights unlock  
524 linear model analysis tools for RNA-seq read counts. *Genome Biology* 15(2):1-  
525 17.
- 526 14. Ritchie ME, *et al.* (2015) limma powers differential expression analyses for  
527 RNA-sequencing and microarray studies. *Nucleic Acids Research* 43(7):e47.
- 528 15. Zhang B & Horvath S (2005) A General Framework for Weighted Gene Co-  
529 expression Network Analysis. *Stat Appl Genet Mol Biol* 4.

531
